# Supplementary material for: Rhinolophus sinicus virome revealed multiple novel mosquito-borne zoonotic viruses
Source: Front Cell Infect Microbiol. 2022 Oct 11;12:960507. doi: 10.3389/fcimb.2022.960507 (PMC9592836; doi:10.3389/fcimb.2022.960507)
Supplement: Supplementary file 11 [file Table_4.xlsx]

## Sheet: Sheet1
>JEV-China/B2016E-4
Tttaattgtctgggaatgggcaatcgtgacttcatagaaggagccactgcagccacttgggtggacttggtgctagaaggagatagctgcttgactaccatggcgaacgacaagccaacattggacgtccgcatgattcacatcgaagctacccaacttgctgaggtccgaagttactgctatcatgcttcactcactgacatctcgacgctgcctcggtgccccacgactggagaaccccacaacgcgaagcgagcagatagtagctatgtgtgcaaacaaggcttcactgatcgtgggtggcgcaaccgatgtggactttgcgggaaggcaagcactgacacatgtgcaaacttctcctgcaccagccaagcgattggcagaacagtccagccagca…
>JEV-China/B2016E-3
Tttaattgtctgggaatgggcaatcgtgacttcatagaaggagccaatgcagccacttgggtggactcggtgctagatggagatagctgcttgacaatcatggcgaacgacaaaccaacattgcacgtccgcatgattaacatcgaatctacccaacttgctgaggtcagaagttactgctaccatgcttcagtcactgacatctcgacggtggctctgtgccccacgactggagaacctcacaacgcgaagccagctgatagtagctatgtgtgcaaacaaggcttctctgatcgtgggtggggcaacggatgtggactttgcgggaagcgaagcactgactcatgtgcaaacttctcttgcaccagccaagcgattggaagaacaatccagtcagca…
>JEV-China/B2016E-2
Tttaattgtctgggaatgggcaatcgtgacttcatagaaggagccactgcagccacttgggtggacttggtgctagaaggagatagctgcttgacgatcatggcgaacgacaagccaacattggacgtccgcatgattcacatcgaagctacccaacttgctgagctcagaagttactgctaccatgcttcactcactgacatctcgacgctgcctcggtgccccacgactggagaagctcacaacgcgaagccagcagatagtagctatgtgtgcaaacaaggcttcactgatcgtgggtggcgcaatggatgtggactttgcgggaaggcaagcactgacacatgtgcaaacttctcctgcaccagccaagcgattgcaagaacagtcgagccagca…
>JEV-China/B2016E-1
Tttaattgtctgggaatgggcaatcgtgacttcatagaaggagccaatgcagccacttgggtggacttggtgctagaaggagatagctgcttgacaatcatggcgaacgacgaaccaacattggacgtccgcatgattaacatcgaagctaccctacttgctgaggtcagaagttactgctatcatgcttcactcactgacatctcgacggtggctcggtgcccctcgactggagaacctcacaacgcgaagcgagctgatagtagctatgcgtgcaaacaaggcttcactgatcgtgggtggggcaacggatgtggactttgcgggaagggaagcactgacacatgtgcagaattctcctgcaccagcaaagcgattggaagaacaatccagccagca…
>KT952294.1_China_2012
TTTAACTGCTTGGGAATGGGGAATCGGGACTTCATAGAAGGAGCCAGTGGAGCCACTTGGGTGGATCTGGTGTTAGAAGGAGATAGCTGTTTGACAATCATGGCAAACGACAAACCAACACTAGATGTCCGCATGATCAACATTGAAGCTAGCCAACTTGCTGAAGTCAGGAGTTACTGCTATCACGCTTCAGTCACTGACATTTCAACGGTGGCTCGCTGCCCCACGACAGGAGAAGCTCACAACGAAAAACGTGCTGACAGCAGCTACGTATGCAAACAAGGCTTTACTGATCGCGGATGGGGAAATGGATGTGGACTTTTCGGGAAAGGAAGCATTGACACATGCGCAAAATTTTCTTGTACCAGTAAGGCCATTGGAAGAATGATCCAACCAGAG…
>HM228923.1_Viet_Nam_2007
TTTAACTGTCTGGGAATGGGGAATCGGGATTTCATAGAAGGAGCCAGTGGAGCCACTTGGGTGGATCTGGTGTTGGAAGGAGATAGCTGTTTGACAATCATGGCAAACGACAAACCAACACTAGATGTCCGCATGATCAACATTGAAGCTAGCCAACTTGCTGAAGTCAGGAGTTACTGCTATCACGCTTCAGTCACTGACATTTCAACGGTGGCTCGATGCCCCACGACTGGAGAAGCCCACAACGAAAAACGTGCCGACAGCAGCTACGTGTGCAAACAAGGCTTTACTGACCGCGGATGGGGAAATGGATGTGGACTTTTCGGGAAAGGAAGCATTGACACATGCGCAAAATTTTCTTGTACCAATAAGGCCATTGGAAGAATGATCCAACCAGAG…
>KY313827.1_Myanmar_2010
TTTAACTGCCTGGGAATGGGGAACCGAGATTTCATAGAAGGAGCCAGTGGAGCCACTTGGGTGGATCTGGTGTTGGAAGGAGACAGTTGTTTGACAATCATGGCAAATGACAAGCCAACACTAGATGTCCGCATGATCAACATTGAGGCCAGCCAACTTGCTGAAGTTAGGAGCTACTGCTATCACGCTTCAGTCACTGACATTTCAACGGTGGCTCGATGCCCCATGACTGGAGAAGCTCACAACGAGAAACGTGCTAATAGCGACTACGTGTGCAAGCAAGGCTTTACTGACCGTGGATGGGGAAATGGATGTGGACTTTTCGGGAAAGGAAGCATTGACACCTGTGCAAAGTTTTCTTGTACCAATAAGGCCGTTGGAAGAACAATCCAACCAGAG…
>DQ111788.1_Thailand_2005
TTTAACTGTCTGGGAATGGGGAATCGGGATTTCATAGAAGGAGTCAGTGGAGCCACTTGGGTGGATCTGGTGTTGGAAGGAGACAGCTGTCTAACAATCATGGCAAGCGATAAGCCAACACTAGATGTCCGTATGATCAATATTGAAGCCAGCCAACTTGCTGAAGTTAGGAGCTACTGCTATCACGCTTCAGTCACTGACATTTCAACGGTGGCTCGATGCCCCACGACTGGAGAAGCTCACAACGAGAAGCGTGCTGATAGCAGCTACGTGTGCAAGCAAGGCTTTACTGACCGCGGGTGGGGAAATGGATGTGGACTTTTTGGGAAAGGAAGCATTGACACCTGCGCAAAGTTTTCTTGTACCAGTAAGGCCACTGGAAAGATGATCCAACCAGAG…
>KM496507.1_South_Korea_2011
TTCAACTGTCTGGGAATGGGGAATCGGGATTTCATAGAAGGAGCCAGTGGAGCCACTTGGGTGGATCTGGTGTTGGAAGGAGATAGCTGTTTGACAATCATGGCAAACGACAAACCAACGCTAGATGTCCGCATGATCAACATTGAAGCTAGCCAACTTGCTGAAGTCAGGAGTTACTGCTATCACGCTTCAGTCACTGACATTTCTACGGTGGCTCGATGCCCCACGACTGGAGAAGCCCACAACGAAAAACGTGCTGACAGCAGCTACGTGTGCAAACAAGGCTTTACTGACCGCGGATGGGGAAATGGATGTGGACTTTTCGGGAAAGGAAGCATTGACACATGCGCAAAATTTTCTTGTACCAGTAAGGCCATTGGAAGAATGATCCAACCAGAG…
>AB795032.1_Japan_2009
TTTAACTGTTTGGGAATGGGGAATCGGGACTTCATAGAAGGAGCCAGTGGAGCCACTTGGGTGGATCTGGTGTTAGAAGGAGATAGCTGTTTGACAATCATGGCAAACGACAAACCAACACTAGATGTCCGCATGATCAACATTGAAGCTAGCCAACTTGCTGAAGTCAGGAGTTACTGCTATCACGCTTCAGTCACTGACATTTCAACGGTGGCTCGATGCCCCACGACAGGAGAAGCTCACAACGAAAAACGTGCCGACAGCAGCTACGTGTGCAAACAAGGCTTTACTGATCGCGGATGGGGAAATGGATGTGGACTTTTCGGGAAAGGAAGCATTGACACATGCGCAAAATTTTCTTGTACCAATAAGGCCATTGGAAGAATGATCCAACCAGAG…
>KU295113.1_China_1989
TTCAACTGTCTGGGAATGGGCAATCGTGACTTCATAGAAGGAGCCAGTGGAGCCACTTGGGTGGACTTGGTGCTAGAAGGAGACAGCTGCTTGACAATTATGGCAAACGACAAACCAACATTGGACGTCCGCATGATCAACATCGAAGCTGTCCAACTTGCTGAGGTCAGAAGTTACTGCTATCATGCTTCAGTCACTGACATTTCGACGGTGGCTCGGTGCCCCACGACTGGAGAAGCTCACAACGAGAAGCGAGCTGATAGTAGCTATGTGTGCAAACAAGGCTTCACTGATCGTGGGTGGGGCAACGGATGTGGACTTTTCGGGAAGGGAAGCATTGACACATGTGCAAAATTCTCCTGCACCAGAAAGGCGATTGGGAGAACAATCCAGCCAGAA…
>KC802022.1_India_2012
TTTCACTGTCTGGGAATGGGCAATCGTGACTTCATAGAAGGAGCCAGCGGAGCCACCTGGGTGGACTTGGTGTTAGAAGGAGACAGCTGCTTGACAATTATGGCAAACGACAAACCAACATTGGACGTCCGCATGATCAACATCGAAGCTAGCCAACTTGCTGAGGTCAGAAGTTACTGCTATCATGCTTCAGTCACTGACATTTCGACGGTGGCTCGGTGCCCCACGACTGGAGAAGCCCACAACGAGAAGCGAGCTGATAGTAGCTATGTGTGCAAACAAGGCTTCACCGATCGTGGGTGGGGTAACGGATGTGGACTTTTCGGGAAGGGAAGCATTGACACATGTGCAAAATTCTCCTGCACCAGTAAAGCGATTGGGAGAACAATCCAGCCAGAA…
>HM596272.1_Malaysia_1952
TTTAACTGCCTAGGCATGGGCAACCGCGACTTCATTGAAGGAGTCAGCGGAGCCACGTGGGTAGACCTGGTGCTGGAAGGAGACAGTTGCCTCACCATCATGGCGAACGATAAACCAACACTGGACGTGCGCATGATAAACATTGAAGCCACGCAACTGGCTGAAGTACGAACCTATTGCTACCACGCTACAGTGGCTGACATTTCAACAGTAGCAAGATGCCCCACGACTGGAGAAGCCCACAACACAAGACGAGCCGATAGCAGTTATGTTTGCAAGCAAGGCTATACAGACCGTGGATGGGGAAACGGATGCGGGTTGTTTGGGAAAGGCAGCATTGACACATGCGCTAAATTTGTCTGCAGCCACAAGGCCATTGGGAAGATAATACAGCCAGAA…
>KM677246.1_Singapore_1952
TTTAACTGCCTAGGCATGGGCAACCGCGACTTCATTGAAGGAGTCAGCGGAGCCACGTGGGTAGACCTGGTGCTGGAAGGAGACAGTTGCCTCACCATCATGGCGAACGATAAACCAACACTGGACGTGCGCATGATAAACATTGAAGCCACGCAACTGGCTGAAGTACGAACCTATTGCTACCACGCTACAGTGGCTGACATTTCAACAGTAGCAAGATGCCCCACGACTGGAGAAGCCCACAACACAAGACGAGCCGATAGCAGTTATGTTTGCAAGCAAGGCTATACAGACCGTGGATGGGGAAACGGATGCGGGTTGTTTGGGAAAGGCAGCATTGACACATGCGCTAAATTTGTCTGCAGCCACAAGGCCATTGGGAAGATAATACAGCCAGAA…
>KR908703.1_South_Korea_1988
TTTAATTGTCTGGGAATGGGCAACCGTGACTTCATAGAAGGAGCCAGTGGAGCCACTTGGGTGGACTTGGTGCTAGAAGGAGATGGCTGCTTGACAATCATGGCAAACGACAAACCAACATTGGACGTCCGCATGATTAACATCGAAGCTAGCCAACTTGCTGAGGTCAGAAGCTATTGCTATCATGCTTCAGTCACTGACATCTCGACGGTGGCTCGGTGCCCCACGACTGGAGAAGCCCACAACGAGAAGCGAGCTGATAGTAGCTATGTGTGCAAACAAGGTTTCACTGATCGTGGGTGGGGCAACGGATGTGGACTTTTCGGGAAGGGAAGCATTGACACATGTGCAAAATTCTCCTGCACCAGTAAGGCGATTGGGAGAACAATCCAGCCAGAA…
>JN587258.1_South_Korea_2010
TTCAACTGCTTAGGTATGGGAAATCGTGACTTCATCGAAGGAGTCAGTGGAGCGACGTGGGTGGACCTGGTGCTGGAAGGAGACAGTTGCCTCACTATCATGGCGAACGACAAACCAACACTGGATGTGCGCATGATAAACATCGAGGCCACGGAACTGGCTGAGGTGCGAACCTACTGCTACCACGCCACAGTGGCTGACATCTCAACAGTGGCGAGATGCCCCACGACTGGAGAAGCCCACAACACGAAGCGAGCTGACAGCAGCTATGTCTGCAAGCAAGGCTACACTGATCGTGGATGGGGAAACGGATGTGGGTTGTTTGGGAAAGGCAGCATTGACACATGCGCCAAGTTTGTTTGCAGCCACAAGGCCATTGGAAAGATAATACAGCCAGAA…
>JF320945.1_Viet_Nam_2003
TTCAACTGTCTGGGAATGGGCTATCGTGACTTCATAGAAGGAGCCAGTGGAGCCACTTGGGTGGACTTGGTGCTAGAAGGAGACAGCTGCTTGACAATTATGGCAAACGACAAACCAACATTGGACGTCCGCATGATCAACATCGAAGCTGTCCAACTTGCTGAGGTCAGAAGTTACTGCTATCATGCTTCAGTCACTGACATTTCGACGGTGGCTCGGTGCCCCACGACTGGAGAAGCTCACAACAATAAGCGAGCTGATAGTAGCTATGTGTGCAAACAAGGCTTCACTGATCGTGGGTGGGGCAACGGATGTGGACTTTTCGGGAAGGGAAGCATTGACACATGTGCAAAATTCTCCTGCACCAGTAAGGCGATTGGGAGAACAATCCAGCCAGAA…
>KF192509.1_Cambodia_1967
TTTAACTGTCTGGGAATGGGGAATCGAGATTTCATAGAAGGAGCCAGTGGAGCCACTTGGGTGGATCTGGTGTTAGAAGGAGATAGTTGTTTGACAATCATGGCAAACGACAAACCAACACTAGATGTCCGCATGATCAACATTGAAGCTAGCCAACTTGCTGAAGTCAGGAGCTACTGCTATCACGCTTCAGTCACTGACATTTCAACGGTGGCTCGATGCCCCACGACTGGAGAAGCTCACAACGAGAAACGTGCTGATAGCAGCTACGTGTGCAAACAAGGCTTTACTGACCGCGGATGGGGAAATGGATGTGGACTTTTCGGGAAAGGAAGCATTGACACATGCGCAAAATTTTCTTGTACCAGTAAGGCCATTGGAAGAACAATCCAACCAGAG…
>FJ872383.1_Japan_1950
TTCAACTGTCTGGGAATGGGCAATCGTGACTTCATAGAAGGAGCCAGTGGAGCCACTTGGGTGGACCTGGTGCTAGAAGGAGACAGCTGCTTGACAATCATGGCAAACGACAAACCAACATTGGACGTCCGCATGATCAACATCGAAGCTAGCCAACTTGCTGAGGTCAGAAGTTACTGCTATCATGCTTCAGTCACTGACATCTCGACGGTGGCTCGGTGCCCCACGACTGGAGAAGCCCACAACGAGAAGCGAGCTGATAGCAGCTATGTGTGCAAACAAGGCTTCACAGATCGTGGGTGGGGCAACGGATGTGGACTTTTCGGGAAGGGAAGTATTGACACATGTGCAAAATTCTCCTGCACCAGGAAAGCGATTGGGAGAACAATCCAGCCAGAA…
>FJ872377.1_Korea_1946
TTCAACTGTCTGGGAATGGGCAATCGTGACTTCATAGAAGGAGCCAGTGGAGCCACTTGGGTGGACTTGGTGCTAGAAGGAGATAGCTGCTTGACAATTATGGCAAACGACAAACCAACATTGGACGTCCGCATGATCAACATCGAAGCTAGCCAACTTGCTGAGGTCAGAAGTTACTGCTATCATGCTTTAGTCACTGACATCTCGACGGTGGCTCGGTGCCCCACGACTGGAGAAGCTCACAACGAGAAGCGAGCTGATAGTAGCTATGTGTGCAAACAAGGCTTCACTGATCGTGGGTGGGGCAACGGATGTGGACTTTTCGGGAAGGGAAGCATTGACACATGTGCAAAATTCTCCTGCACCAGTAAAGCGATTGGGAGAACAATCCAGCCAGAA…
>JQ429310.1_Indonesia_1981
TTCAATTGCTTGGGAATGGGCAACCGTGATTTCATAGAGGGTGTTAGTGGGGCTACCTGGGTGGACTTGGTGCTAGAAGGAGACAGCTGCCTGACAATCATGGCAAATGACAGACCAACATTGGATGTTCGCATGATCAATATTGAAGCTAGCCAACTTGCTGAAGTTAGGAGCTATTGCTATCATGCTTCAGTCACTGATATTTCGACGGTGGCTCGCTGCCCCACGACCGGAGAGGCTCACAACGAAAAACGTGCAGATAGCAGTTATGTATGCAAGCAAGGCTTCACTGATCGCGGATGGGGAAATGGATGTGGACTTTTTGGAAAAGGAAGCATTGACACATGCGCTAAGTTCTCCTGCACTAGCAAAGCAATTGGGAAGACGATTCAGCCAGAA…
>JQ429306.1_Indonesia_1980
TTCAATTGCTTGGGAATGGGCAATCGAGATTTTATCGAAGGAGCTAGTGGAGCTACTTGGGTGGACCTGGTGTTAGAAGGAGATAGCTGCTTAACAATCATGGCAAACGACAAACCAACATTAGATGTCCGCATGATCAACATTGAAGCCAGTCAACTTGCTGAAGTCAGAAGCTACTGCTATCACGCTTCAGTCACCGATATTTCAACGGTGGCTCGATGTCCCACGACTGGAGAAGCTCATAACGAGAAACGCGCTGATAGCAGCTATGTGTGCAAACAAGGTTTCACTGACCGTGGGTGGGGAAATGGATGTGGACTTTTCGGAAAAGGAAGCATTGACACGTGTGCAAAATTTTCTTGTACCAGCAAGGCCATTGGGAGAACAATCCAGCCAGAG…
>JQ429308.1_Indonesia_1987
TTCAACTGTCTGGGAATGGGCAATCGTGACTTCATAGAAGGAGCCAGTGGAGCCACTTGGGTGGACTTGGTGCTAGAAGGAGACAGCTGCTTGACAATTATGGCAAACGACAAACCAACATTGGACGTCCGCATGATCAACATCGAAGCTGTCCAACTTGCTGAGGTCAGAAGTTACTGCTATCATGCTTCAGTCACTGACATTTCGACGGTGGCTCGGTGCCCCACGACTGGAGAAGCTCACAACGAGAAGCGAGCTGATAGTAGCTATGTGTGCAAACAAGGCTTCACTGATCGTGGGTGGGGCAACGGATGTGGACTTTTCGGGAAGGGAAGCATTGACACATGTGCAAAATTCTCCTGCACCAGTAAGGCGATTGGGAGAACAATCCAGCCAGAA…
>HQ223285.1_South_Korea_1951
Ttcaattgcttgggaatgggcaatcgagattttatcgaaggagctagcggagctacttgggtggacctggtgttagaaggagatagctgtttgacaatcatggcaaacgacaaaccaacattggatgtccgcatgattaacattgaagccagtcaacttgctgaagttagaagctactgctatcacgcttcagtcaccgatatttcaacggtggctcgatgtcccacgactggagaagctcataacgagaaacgcgctgatagcagctatgtgtgcaaacaaggtttcactgaccgtgggtggggaaatggatgtggacttttcggaaaaggaagcattgacacatgtgcaaaattttcttgtaccagcaaggccattgggagaacaatccagccagag…
>HQ223286.1_Malaysia_1970
Ttcaattgcttgggaatgggcaatcgagattttatcgaaggagctagtggagctacttgggtggacctggtgttagaaggagatagctgcttgacaatcatggcaaacgacaaaccaacattagatgtccgcatgatcaacattgaagctagtcaacttgctgaagtcagaagctactgctatcacgcttcagtcaccgatatttcaacggtggctcgatgtcccacgactggagaagctcataacgagaaacgtgctgatagtagctatgtgtgcaaacaaggtttcactgaccgtgggtggggaaatggatgtggacttttcggaaaaggaagcattgacacatgtgcaaaattttcttgtaccagcaaggctactgggagaacaatccagccagag…
>KC196115.1_Laos_2009
TTTAACTGTCTGGGAATGGGGAATCGGGATTTCATAGAAGGAGCCAGTGGAGCCACTTGGGTGGATCTGGTGTTGGAAGGAGATAGCTGTTTGACAATCATGGCAAACGACAAGCCAACACTAGATGTCCGCATGATCAACATTGAAGCTAGCCAACTTGCTGAAGTCAGAAGTTACTGCTATCACGCTTCAGTCACTGACATTTCAACGGTGGCTCGATGCCCCACGACTGGAGAAGCCCACAACGAGAAACGTGCCGACAGCAGCTACGTGTGCAAACAAGGCTTTACTGATCGCGGATGGGGAAATGGATGTGGACTTTTCGGGAAAGGAAGCATTGACACATGCGCAAAATTTTCTTGTACCAATAAGGCCATTGGAAGAATGATCCAACCAGAG…
